# Supplementary material
Source: publisher figshare collection journal article supplement (https://tandf.figshare.com/ndownloader/files/12935051)
Supplement: Supplementary file 1 [file 12935051]

## Ratings of Children’s Comments on ‘The Way the Ball Bounces’

| Rating[[1]](#footnote-1) | Age | Comment |
| --- | --- | --- |
| 4 | 10 | It was very funny and it made me laugh, I loved that! |
| 4 | 6 | It was great |
| 4 | 10 | It was fun and exciting I loved it. The CDI made it more interesting. |
| 4 | 11 | Very interesting. I loved it. It made me even more interested in science (I knew most of the thing because my father is a chemical scientist) |
| 4 | 9 | Very good! |
| 4 | 9 | I thought it was very educational and fun. |
| 4 | 8 | The show was funny, exciting, cool, awesome, good, it taught me stuff, crazy, fun and amazing. |
| 4 | 7 | I thought the show was fantastic! |
| 4 | 5 | Very good |
| 4 | 8 | I loved the show! Especially the demonstration! I want to learn more about molecules. |
| 4 | 6 | The show was awesome. |
| 4 | 7 | I loved it! When is the next one? Science is awesome and amazing! |
| 4 | 8 | I thought it was really funny. |
| 4 | 6 | I really liked it. |
| 4 | 8 | I really liked it. |
| 4 | 8 | I liked the show because I love science! |
| 3 | 10 | Cool. I love science! |
| 3 | 8 | It was funny and exciting and fun. |
| 3 | 9 | I liked it because I got both ballots correct |
| 3 | 8 | I like the show. My mom thinks the CDI guy is handsome. |
| 3 | 5 | I liked it because balls are bouncy or not bouncy. |
| 3 | 9 | I learned a lot. |
| 3 | 7 | I thought it was pretty fun and that I should do it again. |
| 3 | 6 | I liked when they bounced the balls. |
| 2 | 9 | It was funny. But kind of fast and didn't let me understand some of it. |
| 2 | 9 | I think the show a little shorter but it was still fun. |
| 1 | 8 | I think you should be a little less funny in the show. |
| 1 | 8 | It was kind of boring. |

1. Rating key: 1 = Expressed criticism only; 2 = expressed both praise and criticism or neither; 3 = included at least one word of praise but without intensifiers; 4 = included at least one word of strong praise or positive words with adverbial intensifiers. [↑](#footnote-ref-1)
